# Supplementary material
Source: PubMed Central journal article supplement (PMC5634667)
Supplement: supp_WNL.0000000000004493_Supplemental_Material.pdf [file supp_WNL.0000000000004493_Supplemental_Material.pdf]

Figure e-1. Temporal trends of CSF protein and glucose levels.

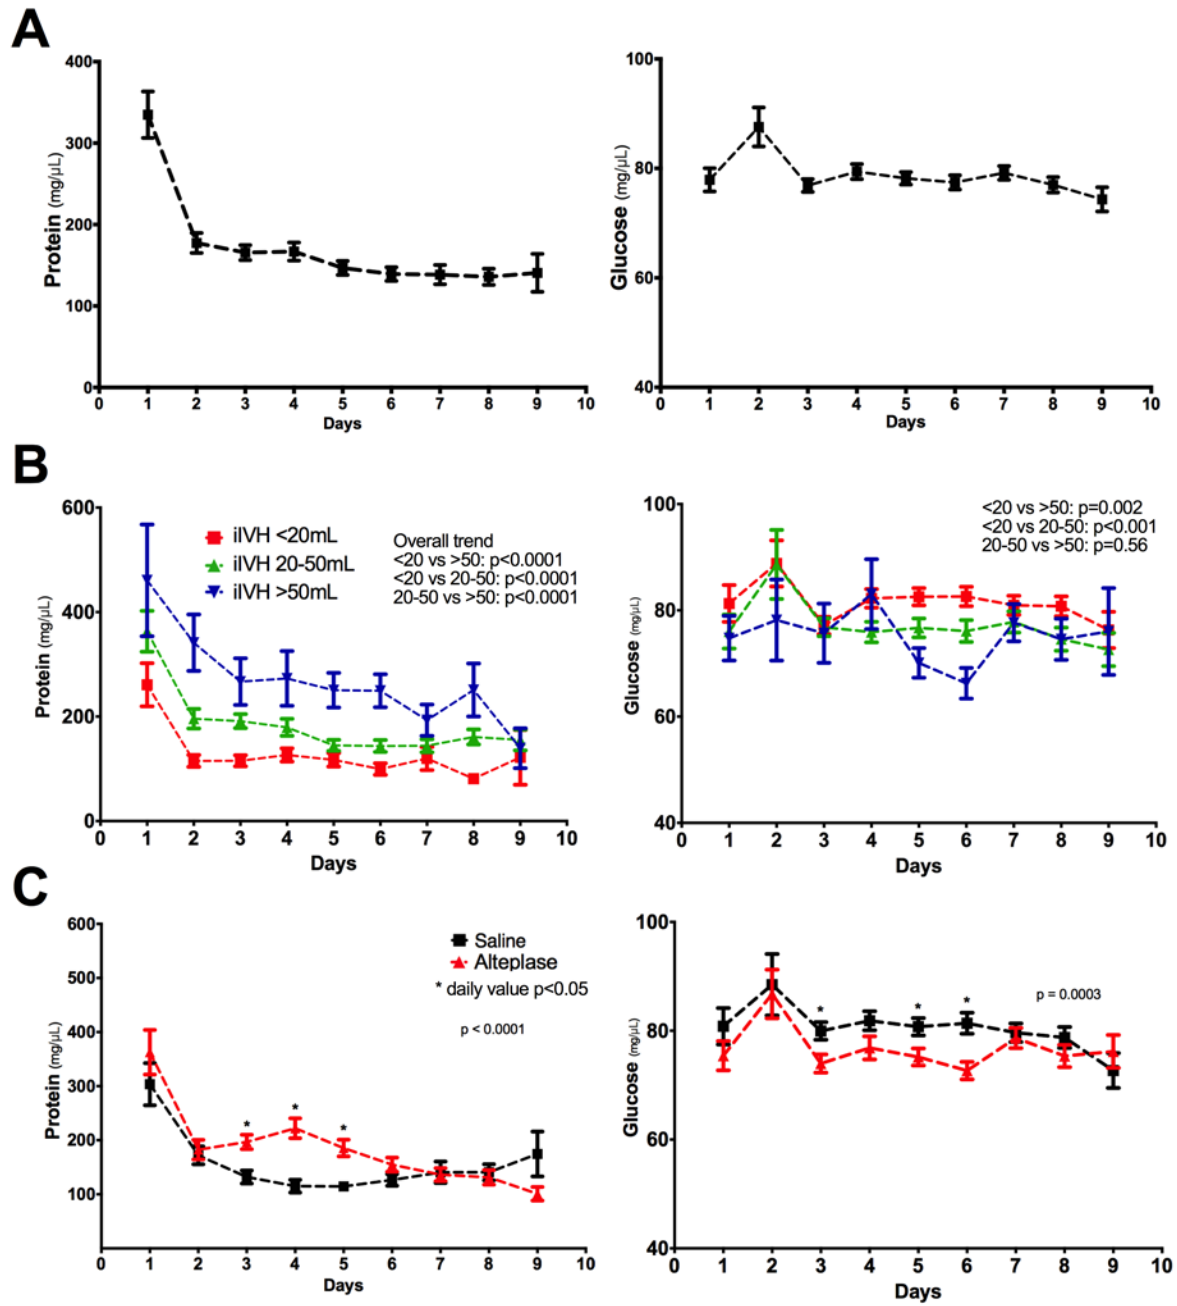

(A) General pattern over days 1-9 post-ictus. (B) Differences among cases with smaller versus larger iIVH volumes. (C) Differences among cases treated with alteplase versus saline. The p value listed with each panel refers to the difference in overall trends for the respective parameter. \* refers to significantly different daily values

Figure e-2: Timing of positive culture and the temporal trends of CSF inflammatory parameters.

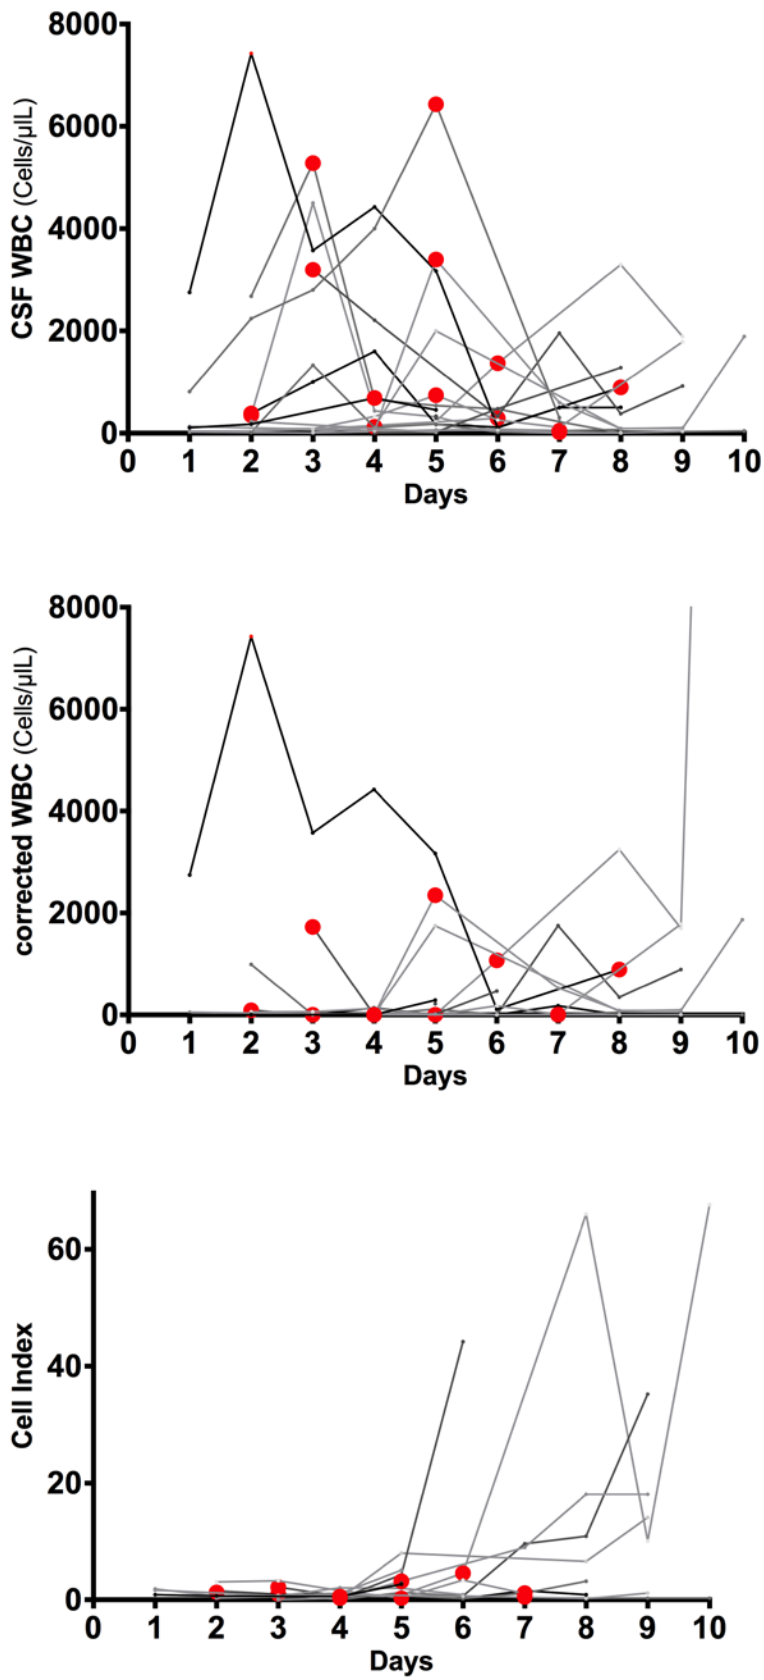

Individual patterns of CSF WBC, cWBC and Cell index in cases with CSF bacterial infection during the study period (within 10 days post-ictus, n=21). Red spot indicates the time of positive culture.

**Figure e-3: Association with bacterial infection within 30 days of ictus.**

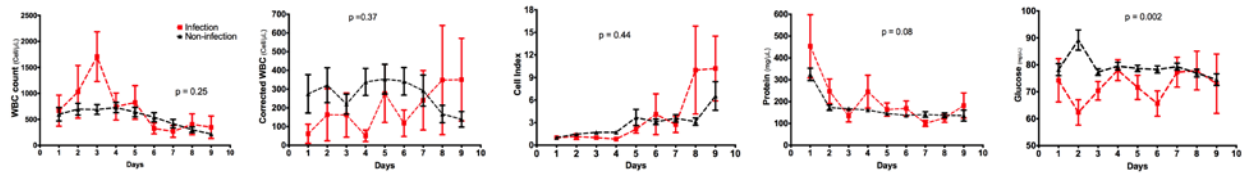

Temporal trend of CSF WBC, cWBC, CI, protein and glucose over days 1-9 post-ictus in cases with and without bacterial infection manifested during the first month (within 30 days post-ictus, n=31). The p value listed with each panel refers to the difference in overall trends for the respective parameter.

**Table e-1**

**Baseline demographics and characteristics of participants in the CLEAR III trial**

|                                                   | <b>Saline<br/>(N=251)</b>                 | <b>Alteplase<br/>(N=249)</b>              | <b>All (N=500)</b>                        |
|---------------------------------------------------|-------------------------------------------|-------------------------------------------|-------------------------------------------|
| <b>Demographic variables</b>                      |                                           |                                           |                                           |
| Age in Years: Median [IQR]                        | 59 [51, 67]                               | 59 [51, 66]                               | 59 [51, 67]                               |
| Gender: Female                                    | 117 (46.6%)                               | 105 (42.2%)                               | 222 (44.4%)                               |
| <b>Race</b>                                       |                                           |                                           |                                           |
| White                                             | 161 (64.1%)                               | 144 (57.8%)                               | 305 (61.0%)                               |
| African American                                  | 78 (31.1%)                                | 92 (36.9%)                                | 170 (34.0%)                               |
| American Indian or Alaskan Native                 | 1 (0.4%)                                  | 0 (0.0%)                                  | 1 (0.2%)                                  |
| Other                                             | 11 (4.4%)                                 | 13 (5.2%)                                 | 24 (4.8%)                                 |
| <b>Ethnicity</b>                                  |                                           |                                           |                                           |
| Hispanic/Latino                                   | 32 (12.7%)                                | 28 (11.2%)                                | 60 (12.0%)                                |
| <b>Baseline variables</b>                         |                                           |                                           |                                           |
| Tobacco Use                                       | 59 (23.5%)                                | 73 (29.3%)                                | 132 (26.4%)                               |
| Cocaine Use                                       | 18 (7.2%)                                 | 12 (4.8%)                                 | 30 (6.0%)                                 |
| Anticoagulated at Registration                    | 29 (11.6%)                                | 20 (8.0%)                                 | 49 (9.8%)                                 |
| Antihypertensive Med Compliant                    | 202 (80.5%)                               | 168 (67.5%)                               | 370 (74.0%)                               |
| Hyperlipidemia Med Compliant                      | 245 (97.6%)                               | 240 (96.4%)                               | 485 (97.0%)                               |
| On Antiplatelet at Registration                   | 72 (28.7%)                                | 56 (22.5%)                                | 128 (25.6%)                               |
| <b>Presentation Blood Pressure</b>                |                                           |                                           |                                           |
| Systolic BP (mmHg): Median [IQR]                  | <b>(N=244)</b><br>191 [166, 221.5]        | <b>(N=244)</b><br>197 [169.2, 220.0]      | <b>(N=488)</b><br>193 [167.0, 220.0]      |
| Diastolic BP (mmHg): Median [IQR]                 | <b>(N=243)</b><br>104 [90.0, 120.0]       | <b>(N=242)</b><br>110 [90.2, 125.8]       | <b>(N=485)</b><br>107 [90.0, 124.0]       |
| <b>Enrollment GCS</b>                             |                                           |                                           |                                           |
| Total: Median [IQR]                               | <b>(N=237)</b><br>10 [7,14]               | <b>(N=233)</b><br>10 [7,14]               | <b>(N=470)</b><br>10 [7,14]               |
| <b>Enrollment NIHSS</b>                           |                                           |                                           |                                           |
| Enrollment NIHSS: Median [IQR]                    | <b>(N=168)</b><br>19 [11, 34]             | <b>(N=175)</b><br>21 [11, 32.5]           | <b>(N=343)</b><br>20 [11, 33]             |
| <b>Stability CT (last CT prior to enrollment)</b> |                                           |                                           |                                           |
| IVH Volume (mL): Median [IQR]                     | 22.4 [12.7, 38.9]                         | 21.2 [12.7, 35.8]                         | 21.8 [12.7, 36.9]                         |
| ICH Volume (mL): Median [IQR]                     | 7.2 [2.3, 14.6]                           | 8.2 [2.8, 15.2]                           | 7.9 [2.5, 15.0]                           |
| <b>Index Clot Location</b>                        |                                           |                                           |                                           |
| Thalamus                                          | 144 (57.4%)                               | 149 (59.8%)                               | 293 (58.6%)                               |
| Primary IVH                                       | 27 (10.8%)                                | 18 (7.2%)                                 | 45 (9%)                                   |
| Ictus to Randomization: Median [IQR]              | 52.2 [41.2, 66.7]                         | 51.8 [36.4, 65.8]                         | 52.1 [39.1, 66.5]                         |
| <b>Average Before Dosing</b>                      |                                           |                                           |                                           |
| Systolic BP (mmHg): Mean (95% CI)                 | <b>(N=251)</b><br>143.4<br>(141.9, 144.9) | <b>(N=247)</b><br>144.5<br>(142.7, 146.4) | <b>(N=498)</b><br>144.0<br>(142.8, 145.1) |
| Diastolic BP (mmHg): Mean (95% CI)                | 70.0<br>(68.6, 71.3)                      | 71.8<br>(70.1, 73.4)                      | 70.9<br>(69.8, 71.9)                      |
| ICP (mmHg): Mean (95% CI)                         | <b>(N=249)</b><br>9.6 (9.1, 10.2)         | <b>(N=246)</b><br>9.0 (8.5, 9.5)          | <b>(N=495)</b><br>9.3 (8.9, 9.7)          |

**Table e-2**

**Distribution of data-point frequency of CSF inflammatory parameters used in the final analyses**

|              | <b>WBC</b> | <b>cWBC</b><br>(Negative data points<br>corrected to zero) | <b>CI</b> | <b>Protein</b> | <b>Glucose</b>  | <b>Total</b> |
|--------------|------------|------------------------------------------------------------|-----------|----------------|-----------------|--------------|
| <b>Day 1</b> | 131        | 109 (70)                                                   | 109       | 140            | 139             | 628          |
| <b>Day 2</b> | 262        | 226 (129)                                                  | 226       | 262            | 265             | 1241         |
| <b>Day 3</b> | 355        | 313 (189)                                                  | 313       | 378            | 374             | 1733         |
| <b>Day 4</b> | 367        | 325 (201)                                                  | 325       | 387            | 383             | 1787         |
| <b>Day 5</b> | 350        | 306 (155)                                                  | 306       | 370            | 370             | 1702         |
| <b>Day 6</b> | 310        | 273 (128)                                                  | 273       | 315            | 318             | 1489         |
| <b>Day 7</b> | 284        | 242 (110)                                                  | 242       | 291            | 293             | 1352         |
| <b>Day 8</b> | 211        | 175 (79)                                                   | 175       | 213            | 212             | 986          |
| <b>Day 9</b> | 105        | 88 (32)                                                    | 88        | 111            | 108             | 500          |
| <b>Total</b> | 2375       | 2057 (1093)                                                | 2057      | 2467           | 2462            | 11418        |
|              |            |                                                            |           |                | <b>Outliers</b> | 42           |
|              |            |                                                            |           |                | <b>Final</b>    | 11,376       |

**Table e-3**  
**Demographic, clinical and treatment characteristics in groups with lower versus higher data-points frequency (<5 vs. ≥ CSF WBC readings)**

| Variable                                      | <5 CSF WBC readings | ≥ 5 CSF WBC readings | P    |
|-----------------------------------------------|---------------------|----------------------|------|
| N                                             | 203                 | 297                  |      |
| <b>Demographic variables</b>                  |                     |                      |      |
| Age in Years:<br>Median [IQR]                 | 59 [52-67]          | 59 [51-66]           | 0.40 |
| Gender: Female                                | 86 (42.4%)          | 136 (45.8%)          | 0.45 |
| <b>Race</b>                                   |                     |                      |      |
| White                                         | 125 (61.58%)        | 180 (60.6%)          | 0.44 |
| African American                              | 66 (32.5%)          | 104 (35.0%)          |      |
| <b>Ethnicity</b>                              |                     |                      |      |
| Hispanic/Latino                               | 29 (14.3%)          | 31 (10.4%)           | 0.19 |
| <b>Clinical Variables</b>                     |                     |                      |      |
| Enrollment GCS Total:<br>Median [IQR]         | 10 [7 – 11]         | 11 [6 – 14]          | 0.27 |
| Diagnosis IVH Volume (mL):<br>Median [IQR]    | 34.0 [22.7-49.4]    | 36.1 [22.9-49.4]     | 0.73 |
| Stability IVH Volume (mL):<br>Median [IQR]    | 20.7 [12.0-34.9]    | 22.6 [13.8-37.6]     | 0.54 |
| Diagnosis ICH Volume (mL):<br>Median [IQR]    | 8.8 [4.0-14.6]      | 7.3 [2.4-13.3]       | 0.06 |
| Diagnosis ICH location:<br>Thalamus (%)       | 130 (64.0%)         | 163 (54.9%)          | 0.04 |
| <b>Treatment Variables</b>                    |                     |                      |      |
| Treatment (tPa)                               | 109 (53.7%)         | 140 (47.1%)          | 0.15 |
| Diagnosis to first EVD (hrs):<br>Median [IQR] | 4.4 [4.0-14.6]      | 4.2 [2.4-13.3]       | 0.04 |
| Ictus to first EVD (hrs):<br>Median [IQR]     | 7.1 [5.0-12.8]      | 7.7 [4.9-11.5]       | 0.40 |
| Ictus to first dose (hrs):<br>Median [IQR]    | 56.1[44.6-70.5]     | 58.3[46.3-70.9]      | 0.96 |
| ICU stay (days):<br>Median [IQR]              | 14.0 [11.0-22.0]    | 15.0 [12.0-21.0]     | 0.61 |
| Mortality (%)                                 | 54 (26.6%)          | 65 (21.9%)           | 0.22 |

**Table e-4**  
**Association of alteplase treatment and CSF WBC (Days 1-9, mean, median and maximum),**  
**analysis repeated with correction for initial IVH volume (iIVH)**

| Parameter         | CSF WBC |                       |        | CSF WBC adjusted for iIVH Volume |        |                       |        |          |
|-------------------|---------|-----------------------|--------|----------------------------------|--------|-----------------------|--------|----------|
|                   | Diff    | 95% Confidence Limits |        | P                                | Diff   | 95% Confidence Limits |        | P        |
| <b>WBC D1</b>     | -20.9   | -498.9                | 457.09 | 0.93                             | -36.01 | -520.1                | 448.1  | 0.88     |
| <b>WBC D2</b>     | 41.6    | -391.8                | 475.1  | 0.85                             | 75.6   | -354.7                | 511.8  | 0.72     |
| <b>WBC D3</b>     | 645.2   | 282.9                 | 1007.5 | 0.0005                           | 672.6  | 312.9                 | 1032.4 | 0.0003   |
| <b>WBC D4</b>     | 646.4   | 282.1                 | 1010.7 | 0.0005                           | 694.4  | 335.2                 | 1053.5 | 0.0002   |
| <b>WBC D5</b>     | 527.0   | 186.4                 | 867.6  | 0.0025                           | 555.0  | 218.2                 | 891.7  | 0.001    |
| <b>WBC D6</b>     | 370.5   | 46.6                  | 694.4  | 0.03                             | 411.9  | 93.0                  | 730.9  | 0.01     |
| <b>WBC D7</b>     | 8.7     | -300.4                | 317.7  | 0.96                             | 14.8   | -296.5                | 326.1  | 0.93     |
| <b>WBC D8</b>     | -23.3   | -229.0                | 182.4  | 0.82                             | -8.6   | -214.5                | 197.4  | 0.93     |
| <b>WBC D9</b>     | -111.5  | -291.4                | 68.4   | 0.22                             | -108.9 | -287.2                | 69.5   | 0.23     |
| <b>WBC mean</b>   | 316.6   | 258.9                 | 374.2  | < 0.0001                         | 350.5  | 294.0                 | 407.0  | < 0.0001 |
| <b>WBC median</b> | 261.4   | 216.1                 | 306.7  | < 0.0001                         | 285.6  | 241.0                 | 330.2  | < 0.0001 |
| <b>WBC max</b>    | 80.0    | 514.6                 | 845.4  | < 0.0001                         | 766.8  | 603.8                 | 929.8  | < 0.0001 |

**Table e-5**  
**Association of alteplase treatment and cWBC (Days 1-9, mean, median and maximum),**  
**analysis repeated with correction for initial IVH volume (iIVH)**

| Parameter          | cWBC   |                       |       | cWBC adjusted for iIVH Volume |        |                       |       |          |
|--------------------|--------|-----------------------|-------|-------------------------------|--------|-----------------------|-------|----------|
|                    | Diff   | 95% Confidence Limits |       | P                             | Diff   | 95% Confidence Limits |       | P        |
| <b>cWBC D1</b>     | -4.5   | -378.5                | 387.6 | 0.98                          | -1.6   | -390.4                | 387.2 | 0.99     |
| <b>cWBC D2</b>     | -17.4  | -374.7                | 340.0 | 0.92                          | -10.3  | -370.4                | 349.8 | 0.96     |
| <b>cWBC D3</b>     | 233.1  | 31.6                  | 434.6 | 0.02                          | 237.6  | 35.3                  | 440.0 | 0.02     |
| <b>cWBC D4</b>     | 327.2  | 60.5                  | 594.0 | 0.02                          | 341.5  | 74.6                  | 608.4 | 0.01     |
| <b>cWBC D5</b>     | 233.7  | -61.6                 | 529.0 | 0.10                          | 246.4  | -47.3                 | 540.2 | 0.10     |
| <b>cWBC D6</b>     | 253.4  | -20.0                 | 526.8 | 0.07                          | 274.5  | 3.6                   | 545.4 | 0.05     |
| <b>cWBC D7</b>     | -90.7  | -408.8                | 223.5 | 0.57                          | -91.7  | -408.5                | 225.2 | 0.56     |
| <b>cWBC D8</b>     | -80.6  | -266.1                | 105.0 | 0.39                          | --75.4 | -261.4                | 110.6 | 0.42     |
| <b>cWBC D9</b>     | -118.9 | -301.6                | 63.8  | 0.20                          | -132.1 | -313.4                | 49.2  | 0.15     |
| <b>cWBC mean</b>   | 125.8  | 85.0                  | 166.6 | < 0.0001                      | 141.3  | 100.7                 | 181.9 | < 0.0001 |
| <b>cWBC median</b> | 63.3   | 35.4                  | 91.1  | < 0.0001                      | 68.9   | 41.0                  | 96.8  | < 0.0001 |
| <b>cWBC max</b>    | 300.8  | 172.5                 | 429.1 | < 0.0001                      | 350.0  | 222.4                 | 477.4 | < 0.0001 |



**Table e-6**  
**Association of alteplase treatment and cell index (Days 1-9, mean, median and maximum),**  
**analysis repeated with correction for initial IVH volume (iIVH)**

| Parameter        | CI    |                       |      |          | CI adjusted for iIVH Volume |                       |      |          |
|------------------|-------|-----------------------|------|----------|-----------------------------|-----------------------|------|----------|
|                  | Diff  | 95% Confidence Limits |      | P        | Diff                        | 95% Confidence Limits |      | P        |
| <b>CI D1</b>     | -0.02 | -0.37                 | 0.42 | 0.91     | -0.001                      | -0.395                | 0.40 | 0.99     |
| <b>CI D2</b>     | -0.06 | -0.60                 | 0.48 | 0.83     | -0.04                       | -0.59                 | 0.50 | 0.88     |
| <b>CI D3</b>     | 0.24  | -0.46                 | 0.95 | 0.50     | 0.22                        | -0.49                 | 0.93 | 0.54     |
| <b>CI D4</b>     | 0.8   | 0.15                  | 1.44 | 0.02     | 0.79                        | 0.14                  | 1.44 | 0.02     |
| <b>CI D5</b>     | 4.01  | 0.02                  | 8.0  | 0.05     | 4.02                        | 0.01                  | 8.03 | 0.05     |
| <b>CI D6</b>     | 1.56  | 0.08                  | 3.03 | 0.04     | 1.57                        | 0.08                  | 3.05 | 0.04     |
| <b>CI D7</b>     | 2.28  | 0.45                  | 4.12 | 0.02     | 2.2                         | 0.36                  | 4.06 | 0.02     |
| <b>CI D8</b>     | -0.5  | -2.86                 | 1.86 | 0.68     | -0.57                       | -2.94                 | 1.81 | 0.64     |
| <b>CI D9</b>     | 2.17  | -4.9                  | 9.28 | 0.54     | 2.15                        | -5.05                 | 9.36 | 0.56     |
| <b>CI mean</b>   | 1.11  | 0.78                  | 1.43 | < 0.0001 | 1.10                        | 0.76                  | 1.43 | < 0.0001 |
| <b>CI median</b> | 1.09  | 0.76                  | 1.43 | < 0.0001 | 0.82                        | 0.65                  | 0.99 | < 0.0001 |
| <b>CI max</b>    | 2.57  | 1.41                  | 3.73 | < 0.0001 | 2.51                        | 1.35                  | 3.68 | < 0.0001 |

**Table e-7**

**Association of CSF bacterial infection during the study period (10 days post-ictus) and CSF inflammatory parameters (Days 1-9, mean, median and maximum)**

**CSF WBC**

| Effect            | Diff   | 95% Confidence |        | P        |
|-------------------|--------|----------------|--------|----------|
|                   |        | Limits         |        |          |
| <b>WBC D1</b>     | 165.8  | -1079.6        | 1411.1 | 0.79     |
| <b>WBC D2</b>     | 547.3  | -530.9         | 1625.4 | 0.32     |
| <b>WBC D3</b>     | 1121.8 | 109.4          | 2134.2 | 0.03     |
| <b>WBC D4</b>     | 209.0  | -697.3         | 1115.3 | 0.65     |
| <b>WBC D5</b>     | 518.8  | -302.9         | 1340.5 | 0.22     |
| <b>WBC D6</b>     | -235.1 | -1114.2        | 644.0  | 0.60     |
| <b>WBC D7</b>     | -36.9  | -837.8         | 763.9  | 0.93     |
| <b>WBC D8</b>     | 308.0  | -152.8         | 768.7  | 0.19     |
| <b>WBC D9</b>     | 300.3  | -71.9          | 672.4  | 0.11     |
| <b>WBC mean</b>   | 234.8  | 87.7           | 382.0  | 0.002    |
| <b>WBC median</b> | 256.3  | 140.7          | 372.0  | < 0.0001 |
| <b>WBC max</b>    | 642.9  | 223.2          | 1062.6 | 0.003    |

**cWBC**

| Effect             | Diff   | 95% Confidence |        | P    |
|--------------------|--------|----------------|--------|------|
|                    |        | Limits         |        |      |
| <b>cWBC D1</b>     | -246.0 | -1415.4        | 923.4  | 0.68 |
| <b>cWBC D2</b>     | -157.7 | -1191.0        | 875.6  | 0.76 |
| <b>cWBC D3</b>     | -18.7  | -626.1         | 588.8  | 0.95 |
| <b>cWBC D4</b>     | -310.2 | -1024.8        | 404.5  | 0.39 |
| <b>cWBC D5</b>     | 51.4   | -713.8         | 816.6  | 0.89 |
| <b>cWBC D6</b>     | -142.7 | -912.9         | 627.5  | 0.72 |
| <b>cWBC D7</b>     | 65.7   | -877.3         | 1008.8 | 0.89 |
| <b>cWBC D8</b>     | 310.9  | -132.5         | 754.4  | 0.17 |
| <b>cWBC D9</b>     | 328.8  | -0.6           | 658.2  | 0.05 |
| <b>cWBC mean</b>   | -13.5  | -124.3         | 97.3   | 0.81 |
| <b>cWBC median</b> | 36.1   | -39.2          | 111.4  | 0.35 |
| <b>cWBC max</b>    | -118.8 | -466.0         | 228.4  | 0.50 |

**Cell Index**

| Effect           | Diff | 95% Confidence |      | P        |
|------------------|------|----------------|------|----------|
|                  |      | Limits         |      |          |
| <b>CI D1</b>     | 0.5  | -0.7           | 1.7  | 0.40     |
| <b>CI D2</b>     | -0.3 | -1.9           | 1.2  | 0.68     |
| <b>CI D3</b>     | -0.6 | -2.8           | 1.5  | 0.55     |
| <b>CI D4</b>     | -0.9 | -2.6           | 0.8  | 0.31     |
| <b>CI D5</b>     | -1.0 | -11.3          | 9.4  | 0.85     |
| <b>CI D6</b>     | 3.1  | -1.0           | 7.2  | 0.14     |
| <b>CI D7</b>     | -0.2 | -5.7           | 5.3  | 0.94     |
| <b>CI D8</b>     | 10.2 | 4.8            | 15.5 | 0.001    |
| <b>CI D9</b>     | 6.8  | -7.1           | 20.6 | 0.33     |
| <b>CI mean</b>   | 2.3  | 1.4            | 3.1  | < 0.0001 |
| <b>CI median</b> | 1.0  | 0.5            | 1.5  | < 0.0001 |
| <b>CI max</b>    | 6.4  | 3.3            | 9.5  | < 0.0001 |

**Table e-8**

**Univariate correlation of poor functional outcome (mRS 4-6) at 30 and 180 days with daily, mean, median and maximal CSF WBC, cWBC and cell index**

Poor outcome vs WBC (Days 1-9, mean, median and maximum)

| Parameter         | 30 days  |                       |        |      | 180 days |                       |        |      |
|-------------------|----------|-----------------------|--------|------|----------|-----------------------|--------|------|
|                   | Estimate | 95% Confidence Limits |        | P    | Estimate | 95% Confidence Limits |        | P    |
| <b>WBC D1</b>     | 0.0000   | -0.0003               | 0.0003 | 0.93 | 0.0001   | -0.0002               | 0.0004 | 0.47 |
| <b>WBC D2</b>     | 0.0001   | -0.0001               | 0.0003 | 0.22 | 0.0001   | -0.0000               | 0.0003 | 0.15 |
| <b>WBC D3</b>     | 0.0002   | 0.0000                | 0.0004 | 0.10 | -0.0000  | -0.0001               | 0.0001 | 0.87 |
| <b>WBC D4</b>     | 0.0001   | -0.0002               | 0.0003 | 0.66 | 0.0001   | -0.0001               | 0.0004 | 0.20 |
| <b>WBC D5</b>     | 0.0000   | -0.0001               | 0.0001 | 0.98 | 0.0001   | -0.0001               | 0.0002 | 0.35 |
| <b>WBC D6</b>     | 0.0001   | -0.0002               | 0.0003 | 0.67 | 0.0002   | -0.0001               | 0.0004 | 0.14 |
| <b>WBC D7</b>     | 0.0004   | -0.0001               | 0.0009 | 0.15 | 0.0001   | -0.0001               | 0.0003 | 0.26 |
| <b>WBC D8</b>     | 0.0008   | -0.0004               | 0.0019 | 0.18 | 0.0005   | -0.0001               | 0.0010 | 0.12 |
| <b>WBC D9</b>     | 0.0004   | -0.0010               | 0.0018 | 0.58 | 0.0001   | -0.0007               | 0.0009 | 0.73 |
| <b>WBC mean</b>   | 0.0002   | -0.0001               | 0.0006 | 0.23 | 0.0002   | 0.0000                | 0.0004 | 0.09 |
| <b>WBC median</b> | 0.0002   | -0.0002               | 0.0007 | 0.26 | 0.0002   | 0.0000                | 0.0005 | 0.10 |
| <b>WBC max</b>    | 0.0001   | -0.0001               | 0.0002 | 0.30 | 0.0000   | 0.0000                | 0.0001 | 0.24 |

Poor outcome vs cWBC (Days 1-9, mean, median and maximum)

| Parameter          | 30 days  |                       |        |      | 180 days |                       |        |      |
|--------------------|----------|-----------------------|--------|------|----------|-----------------------|--------|------|
|                    | Estimate | 95% Confidence Limits |        | P    | Estimate | 95% Confidence Limits |        | P    |
| <b>cWBC D1</b>     | 0.0000   | -0.0004               | 0.0005 | 0.86 | 0.0001   | -0.0003               | 0.0004 | 0.61 |
| <b>cWBC D2</b>     | 0.0001   | -0.0002               | 0.0004 | 0.49 | 0.0002   | -0.0000               | 0.0005 | 0.11 |
| <b>cWBC D3</b>     | 0.0004   | -0.0002               | 0.0009 | 0.19 | 0.0001   | -0.0002               | 0.0004 | 0.49 |
| <b>cWBC D4</b>     | 0.0000   | -0.0003               | 0.0003 | 0.97 | 0.0001   | -0.0001               | 0.0003 | 0.44 |
| <b>cWBC D5</b>     | 0.0000   | -0.0002               | 0.0002 | 0.98 | 0.0001   | -0.0001               | 0.0002 | 0.39 |
| <b>cWBC D6</b>     | 0.0000   | -0.0003               | 0.0002 | 0.75 | 0.0002   | -0.0001               | 0.0004 | 0.26 |
| <b>cWBC D7</b>     | 0.0003   | -0.0001               | 0.0008 | 0.17 | 0.0001   | -0.0001               | 0.0003 | 0.31 |
| <b>cWBC D8</b>     | 0.0007   | -0.0004               | 0.0018 | 0.21 | 0.0006   | -0.0001               | 0.0013 | 0.11 |
| <b>cWBC D9</b>     | 0.0013   | 0.0000                | 0.0026 | 0.05 | 0.0004   | -0.0006               | 0.0013 | 0.46 |
| <b>cWBC mean</b>   | 0.0002   | -0.0002               | 0.0007 | 0.30 | 0.0003   | 0.0000                | 0.0007 | 0.05 |
| <b>cWBC median</b> | 0.0006   | -0.0002               | 0.0014 | 0.12 | 0.0004   | -0.0001               | 0.0008 | 0.10 |
| <b>cWBC max</b>    | 0.0000   | -0.0001               | 0.0002 | 0.65 | 0.0001   | 0.0000                | 0.0002 | 0.10 |

Poor outcome vs CI (Days 1-9, mean, median and maximum)

| Parameter        | 30 days  |                       |        |      | 180 days |                       |        |      |
|------------------|----------|-----------------------|--------|------|----------|-----------------------|--------|------|
|                  | Estimate | 95% Confidence Limits |        | P    | Estimate | 95% Confidence Limits |        | P    |
| <b>CI D1</b>     | 0.1533   | -0.2504               | 0.5570 | 0.46 | -0.1543  | -0.5455               | 0.2369 | 0.44 |
| <b>CI D2</b>     | -0.0161  | -0.1618               | 0.1296 | 0.83 | 0.0658   | -0.0632               | 0.1947 | 0.32 |
| <b>CI D3</b>     | 0.0509   | -0.0408               | 0.1426 | 0.28 | 0.0499   | -0.0218               | 0.1216 | 0.17 |
| <b>CI D4</b>     | -0.0257  | -0.1079               | 0.0566 | 0.54 | -0.0321  | -0.1038               | 0.0397 | 0.38 |
| <b>CI D5</b>     | 0.0014   | -0.0089               | 0.0116 | 0.79 | -0.0063  | -0.0176               | 0.0049 | 0.27 |
| <b>CI D6</b>     | -0.0121  | -0.0554               | 0.0313 | 0.59 | -0.0146  | -0.0537               | 0.0245 | 0.46 |
| <b>CI D7</b>     | 0.0052   | -0.0321               | 0.0425 | 0.78 | -0.0201  | -0.0593               | 0.0192 | 0.32 |
| <b>CI D8</b>     | 0.0129   | -0.0325               | 0.0584 | 0.58 | 0.0093   | -0.0263               | 0.0450 | 0.61 |
| <b>CI D9</b>     | -0.0030  | -0.0257               | 0.0198 | 0.80 | -0.0420  | -0.0926               | 0.0085 | 0.10 |
| <b>CI mean</b>   | 0.0217   | -0.0260               | 0.0694 | 0.37 | -0.0311  | -0.0715               | 0.0093 | 0.13 |
| <b>CI median</b> | 0.0499   | -0.0378               | 0.1375 | 0.26 | -0.0560  | -0.1235               | 0.0114 | 0.10 |
| <b>CI max</b>    | 0.0032   | -0.0070               | 0.0135 | 0.54 | -0.0076  | -0.0186               | 0.0034 | 0.17 |

**Table e-9**  
**Univariate correlation of mortality at 30 and 180-days with daily, mean, median and maximum CSF WBC, cWBC and cell index**

Mortality vs CSF WBC (Days 1-9, mean, median and maximum)

| Parameter         | 30 days  |                       |        |      | 180 days |                       |        |      |
|-------------------|----------|-----------------------|--------|------|----------|-----------------------|--------|------|
|                   | Estimate | 95% Confidence Limits |        | P    | Estimate | 95% Confidence Limits |        | P    |
| <b>WBC D1</b>     | 0.0001   | -0.0003               | 0.0006 | 0.51 | 0.0002   | -0.0001               | 0.0006 | 0.17 |
| <b>WBC D2</b>     | 0.0001   | -0.0002               | 0.0004 | 0.56 | 0.0001   | -0.0001               | 0.0004 | 0.29 |
| <b>WBC D3</b>     | 0.0000   | -0.0002               | 0.0002 | 0.92 | -0.0000  | -0.0001               | 0.0001 | 0.97 |
| <b>WBC D4</b>     | -0.0001  | -0.0002               | 0.0001 | 0.25 | -0.0001  | -0.0002               | 0.0001 | 0.37 |
| <b>WBC D5</b>     | -0.0001  | -0.0002               | 0.0001 | 0.26 | 0.0000   | -0.0001               | 0.0002 | 0.66 |
| <b>WBC D6</b>     | -0.0001  | -0.0002               | 0.0001 | 0.55 | 0.0000   | -0.0001               | 0.0002 | 0.65 |
| <b>WBC D7</b>     | 0.0004   | -0.0002               | 0.0009 | 0.17 | 0.0001   | -0.0002               | 0.0003 | 0.68 |
| <b>WBC D8</b>     | -0.0002  | -0.0006               | 0.0002 | 0.28 | -0.0003  | -0.0006               | 0.0001 | 0.15 |
| <b>WBC D9</b>     | -0.0004  | -0.0016               | 0.0009 | 0.57 | -0.0005  | -0.0013               | 0.0003 | 0.24 |
| <b>WBC mean</b>   | 0.0000   | -0.0003               | 0.0002 | 0.70 | 0.0000   | -0.0002               | 0.0002 | 0.98 |
| <b>WBC median</b> | 0.0000   | 0.0002                | 0.0004 | 0.86 | -0.0001  | -0.0004               | 0.0002 | 0.54 |
| <b>WBC max</b>    | 0.0000   | -0.0001               | 0.0001 | 0.77 | 0.0000   | -0.0001               | 0.0001 | 0.95 |

Mortality vs cWBC (Days 1-9, mean, median and maximum)

| Parameter          | 30 days  |                       |        |      | 180 days |                       |        |      |
|--------------------|----------|-----------------------|--------|------|----------|-----------------------|--------|------|
|                    | Estimate | 95% Confidence Limits |        | P    | Estimate | 95% Confidence Limits |        | P    |
| <b>cWBC D1</b>     | 0.0004   | -0.0004               | 0.0012 | 0.37 | 0.0009   | -0.0006               | 0.0024 | 0.26 |
| <b>cWBC D2</b>     | 0.0000   | -0.0003               | 0.0002 | 0.86 | 0.0001   | -0.0002               | 0.0003 | 0.58 |
| <b>cWBC D3</b>     | -0.0001  | -0.0004               | 0.0002 | 0.54 | -0.0001  | -0.0003               | 0.0002 | 0.54 |
| <b>cWBC D4</b>     | -0.0001  | -0.0003               | 0.0001 | 0.37 | -0.0001  | -0.0002               | 0.0001 | 0.52 |
| <b>cWBC D5</b>     | -0.0001  | -0.0003               | 0.0001 | 0.21 | 0.0000   | -0.0002               | 0.0002 | 0.98 |
| <b>cWBC D6</b>     | -0.0001  | -0.0003               | 0.0001 | 0.50 | 0.0001   | -0.0002               | 0.0003 | 0.62 |
| <b>cWBC D7</b>     | 0.0007   | -0.0005               | 0.0019 | 0.24 | 0.0001   | -0.0003               | 0.0005 | 0.64 |
| <b>cWBC D8</b>     | -0.0003  | -0.0009               | 0.0003 | 0.29 | -0.0003  | -0.0008               | 0.0001 | 0.15 |
| <b>cWBC D9</b>     | -0.0005  | -0.0019               | 0.0009 | 0.48 | -0.0007  | -0.0017               | 0.0003 | 0.18 |
| <b>cWBC mean</b>   | -0.0002  | -0.0005               | 0.0002 | 0.41 | 0.0000   | -0.0003               | 0.0003 | 0.95 |
| <b>cWBC median</b> | 0.0000   | -0.0006               | 0.0005 | 0.87 | -0.0003  | -0.0008               | 0.0003 | 0.40 |
| <b>cWBC max</b>    | 0.0000   | -0.0002               | 0.0001 | 0.45 | 0.0000   | -0.0001               | 0.0001 | 0.87 |

Mortality vs CI (Days 1-9, mean, median and maximum)

| Parameter        | 30 days  |                       |         |       | 180 days |                       |        |       |
|------------------|----------|-----------------------|---------|-------|----------|-----------------------|--------|-------|
|                  | Estimate | 95% Confidence Limits |         | P     | Estimate | 95% Confidence Limits |        | P     |
| <b>CI D1</b>     | 0.1881   | -0.2851               | 0.6614  | 0.44  | 0.4156   | -0.0466               | 0.8778 | 0.08  |
| <b>CI D2</b>     | -0.0324  | -0.2303               | 0.1655  | 0.75  | 0.0054   | -0.1502               | 0.1611 | 0.95  |
| <b>CI D3</b>     | -0.0347  | -0.1172               | 0.0478  | 0.41  | -0.0447  | -0.1276               | 0.0382 | 0.29  |
| <b>CI D4</b>     | -0.0445  | -0.1293               | 0.0403  | 0.30  | -0.0178  | -0.0922               | 0.0566 | 0.64  |
| <b>CI D5</b>     | 0.0145   | -0.0166               | 0.0455  | 0.36  | 0.0271   | -0.0078               | 0.0619 | 0.13  |
| <b>CI D6</b>     | 0.0253   | -0.0272               | 0.0779  | 0.35  | -0.0012  | -0.0453               | 0.0430 | 0.96  |
| <b>CI D7</b>     | 0.0135   | -0.0454               | 0.0725  | 0.65  | 0.0627   | -0.0180               | 0.1434 | 0.13  |
| <b>CI D8</b>     | -0.0509  | -0.0868               | -0.0151 | 0.005 | -0.0300  | -0.0648               | 0.0049 | 0.09  |
| <b>CI D9</b>     | 0.0432   | -0.0285               | 0.1150  | 0.24  | 0.0790   | 0.0048                | 0.1531 | 0.048 |
| <b>CI mean</b>   | 0.0027   | -0.0433               | 0.0488  | 0.91  | 0.0134   | -0.0282               | 0.0550 | 0.53  |
| <b>CI median</b> | 0.0018   | -0.0947               | 0.0984  | 0.97  | 0.0296   | -0.0518               | 0.1111 | 0.48  |
| <b>CI max</b>    | 0.0008   | -0.0119               | 0.0134  | 0.90  | 0.0054   | -0.0076               | 0.0183 | 0.42  |

**Table e-10**

**Multivariate modeling of poor functional outcome (mRS 4-6) at 30 and 180 days in relation to CSF mean, median and maximum WBC count, cWBC and cell index**

CSF WBC (mean per subject)

| Parameter                | 30 days  |                       |        |          | 180 days |                       |         |          |
|--------------------------|----------|-----------------------|--------|----------|----------|-----------------------|---------|----------|
|                          | Estimate | 95% Confidence Limits |        | P        | Estimate | 95% Confidence Limits |         | P        |
| <b>IVH volume</b>        | 0.0713   | 0.0472                | 0.0954 | < 0.0001 | 0.0523   | 0.0364                | 0.0682  | < 0.0001 |
| <b>IVH evacuation</b>    | -0.7254  | -1.7846               | 0.3339 | 0.18     | -0.3265  | -0.8766               | 0.2236  | 0.24     |
| <b>ICH volume</b>        | 0.2305   | 0.1513                | 0.3097 | < 0.0001 | 0.1192   | 0.0808                | 0.1577  | < 0.0001 |
| <b>ICH: thalamus</b>     | 1.2893   | 0.5731                | 2.0054 | 0.0004   | 1.1041   | 0.4925                | 1.7157  | 0.0004   |
| <b>GCS: presentation</b> | -0.0269  | -0.1084               | 0.0545 | 0.52     | -0.0722  | -0.1259               | -0.0184 | 0.009    |
| <b>CSF WBC mean</b>      | -0.0001  | -0.0005               | 0.0002 | 0.40     | -0.0001  | -0.0003               | 0.0002  | 0.59     |

CSF WBC (median per subject)

| Parameter                | 30 days  |                       |        |          | 180 days |                       |         |          |
|--------------------------|----------|-----------------------|--------|----------|----------|-----------------------|---------|----------|
|                          | Estimate | 95% Confidence Limits |        | P        | Estimate | 95% Confidence Limits |         | P        |
| <b>IVH volume</b>        | 0.0722   | 0.0480                | 0.0963 | < 0.0001 | 0.0516   | 0.0357                | 0.0674  | < 0.0001 |
| <b>IVH evacuation</b>    | -0.7164  | -1.7619               | 0.3292 | 0.18     | -0.3550  | -0.9165               | 0.2066  | 0.22     |
| <b>ICH volume</b>        | 0.2328   | 0.1523                | 0.3133 | < 0.0001 | 0.1179   | 0.0794                | 0.1565  | < 0.0001 |
| <b>ICH: thalamus</b>     | 1.2876   | 0.5717                | 2.0035 | 0.0004   | 1.1177   | 0.5058                | 1.7297  | 0.0003   |
| <b>GCS: presentation</b> | -0.0284  | -0.1101               | 0.0533 | 0.50     | -0.0705  | -0.1240               | -0.0169 | 0.01     |
| <b>CSF WBC median</b>    | -0.0003  | -0.0007               | 0.0002 | 0.25     | -0.0000  | -0.0003               | 0.0003  | 0.94     |

CSF WBC (maximum per subject)

| Parameter                | 30 days  |                       |        |          | 180 days |                       |         |          |
|--------------------------|----------|-----------------------|--------|----------|----------|-----------------------|---------|----------|
|                          | Estimate | 95% Confidence Limits |        | P        | Estimate | 95% Confidence Limits |         | P        |
| <b>IVH volume</b>        | 0.0701   | 0.0464                | 0.0937 | < 0.0001 | 0.0529   | 0.0370                | 0.0689  | < 0.0001 |
| <b>IVH evacuation</b>    | -0.7587  | -1.8251               | 0.3077 | 0.16     | -0.2953  | -0.8324               | 0.2418  | 0.28     |
| <b>ICH volume</b>        | 0.2290   | 0.1506                | 0.3074 | < 0.0001 | 0.1210   | 0.0825                | 0.1594  | < 0.0001 |
| <b>ICH: thalamus</b>     | 1.2954   | 0.5768                | 2.0140 | 0.0004   | 1.0777   | 0.4658                | 1.6895  | 0.0006   |
| <b>GCS: presentation</b> | -0.0243  | -0.1047               | 0.0561 | 0.55     | -0.0738  | -0.1274               | -0.0201 | 0.007    |
| <b>CSF WBC maximum</b>   | -0.0000  | -0.0001               | 0.0001 | 0.74     | -0.0001  | -0.0001               | 0.0000  | 0.29     |

cWBC (mean per subject)

| Parameter                | 30 days  |                       |        |          | 180 days |                       |         |          |
|--------------------------|----------|-----------------------|--------|----------|----------|-----------------------|---------|----------|
|                          | Estimate | 95% Confidence Limits |        | P        | Estimate | 95% Confidence Limits |         | P        |
| <b>IVH volume</b>        | 0.0691   | 0.0452                | 0.0931 | < 0.0001 | 0.0496   | 0.0332                | 0.0660  | < 0.0001 |
| <b>IVH evacuation</b>    | -0.7867  | -1.8938               | 0.3203 | 0.16     | -0.4650  | -1.0847               | 0.1547  | 0.14     |
| <b>ICH volume</b>        | 0.2322   | 0.1494                | 0.3149 | < 0.0001 | 0.1133   | 0.0742                | 0.1524  | < 0.0001 |
| <b>ICH: thalamus</b>     | 1.3353   | 0.5855                | 2.0850 | 0.0005   | 1.0665   | 0.4320                | 1.7010  | 0.001    |
| <b>GCS: presentation</b> | -0.0150  | -0.0960               | 0.0659 | 0.72     | -0.0612  | -0.1170               | -0.0054 | 0.03     |
| <b>cWBC mean</b>         | -0.0001  | -0.0006               | 0.0005 | 0.84     | 0.0001   | -0.0003               | 0.0006  | 0.58     |

cWBC (median per subject)

| Parameter                | 30 days  |                       |        |          | 180 days |                       |         |          |
|--------------------------|----------|-----------------------|--------|----------|----------|-----------------------|---------|----------|
|                          | Estimate | 95% Confidence Limits |        | P        | Estimate | 95% Confidence Limits |         | P        |
| <b>IVH volume</b>        | 0.0690   | 0.0449                | 0.0930 | < 0.0001 | 0.0498   | 0.0334                | 0.0662  | < 0.0001 |
| <b>IVH evacuation</b>    | -0.7968  | -1.8995               | 0.3060 | 0.16     | -0.4441  | -1.0520               | 0.1638  | 0.15     |
| <b>ICH volume</b>        | 0.2322   | 0.1489                | 0.3155 | < 0.0001 | 0.1137   | 0.0746                | 0.1528  | < 0.0001 |
| <b>ICH: thalamus</b>     | 1.3399   | 0.5920                | 2.0878 | 0.0004   | 1.0548   | 0.4246                | 1.6850  | 0.001    |
| <b>GCS: presentation</b> | -0.0142  | -0.0941               | 0.0657 | 0.73     | -0.0626  | -0.1181               | -0.0070 | 0.03     |
| <b>cWBC median</b>       | -0.0001  | -0.0010               | 0.0009 | 0.90     | 0.0001   | -0.0006               | 0.0008  | 0.79     |

cWBC (maximum per subject)

| Parameter                | 30 days  |                       |        |          | 180 days |                       |         |          |
|--------------------------|----------|-----------------------|--------|----------|----------|-----------------------|---------|----------|
|                          | Estimate | 95% Confidence Limits |        | P        | Estimate | 95% Confidence Limits |         | P        |
| <b>IVH volume</b>        | 0.0691   | 0.0453                | 0.0929 | < 0.0001 | 0.0497   | 0.0333                | 0.0661  | < 0.0001 |
| <b>IVH evacuation</b>    | -0.7859  | -1.8926               | 0.3207 | 0.16     | -0.4638  | -1.0844               | 0.1568  | 0.14     |
| <b>ICH volume</b>        | 0.2319   | 0.1494                | 0.3144 | < 0.0001 | 0.1138   | 0.0747                | 0.1528  | < 0.0001 |
| <b>ICH: thalamus</b>     | 1.3327   | 0.5803                | 2.0851 | 0.0005   | 1.0691   | 0.4327                | 1.7055  | 0.001    |
| <b>GCS: presentation</b> | -0.0150  | -0.0952               | 0.0651 | 0.71     | -0.0612  | -0.1169               | -0.0056 | 0.03     |
| <b>cWBC maximum</b>      | -0.0000  | -0.0002               | 0.0001 | 0.82     | 0.0000   | -0.0001               | 0.0002  | 0.58     |



Cell Index (mean per subject)

| Parameter                | 30 days  |                       |        |          | 180 days |                       |         |          |
|--------------------------|----------|-----------------------|--------|----------|----------|-----------------------|---------|----------|
|                          | Estimate | 95% Confidence Limits |        | P        | Estimate | 95% Confidence Limits |         | P        |
| <b>IVH volume</b>        | 0.0696   | 0.0460                | 0.0932 | < 0.0001 | 0.0495   | 0.0332                | 0.0658  | < 0.0001 |
| <b>IVH evacuation</b>    | -0.8264  | -1.9051               | 0.2523 | 0.13     | -0.3812  | -0.9625               | 0.2002  | 0.20     |
| <b>ICH volume</b>        | 0.2375   | 0.1514                | 0.3236 | < 0.0001 | 0.1172   | 0.0769                | 0.1575  | < 0.0001 |
| <b>ICH: thalamus</b>     | 1.3070   | 0.5611                | 2.0529 | 0.0006   | 0.9939   | 0.3682                | 1.6196  | 0.002    |
| <b>GCS: presentation</b> | -0.0153  | -0.0956               | 0.0650 | 0.71     | -0.0626  | -0.1178               | -0.0075 | 0.03     |
| <b>CI mean</b>           | 0.0609   | -0.0164               | 0.1383 | 0.12     | -0.0283  | -0.0794               | 0.0229  | 0.28     |

Cell Index (median per subject)

| Parameter                | 30 days  |                       |        |          | 180 days |                       |         |          |
|--------------------------|----------|-----------------------|--------|----------|----------|-----------------------|---------|----------|
|                          | Estimate | 95% Confidence Limits |        | P        | Estimate | 95% Confidence Limits |         | P        |
| <b>IVH volume</b>        | 0.0695   | 0.0462                | 0.0929 | < 0.0001 | 0.0496   | 0.0333                | 0.0658  | < 0.0001 |
| <b>IVH evacuation</b>    | -0.8157  | -1.8981               | 0.2666 | 0.14     | -0.3869  | -0.9713               | 0.1975  | 0.19     |
| <b>ICH volume</b>        | 0.2354   | 0.1503                | 0.3206 | < 0.0001 | 0.1175   | 0.0773                | 0.1578  | < 0.0001 |
| <b>ICH: thalamus</b>     | 1.3229   | 0.5750                | 2.0709 | 0.0005   | 0.9979   | 0.3727                | 1.6231  | 0.002    |
| <b>GCS: presentation</b> | -0.0196  | -0.1004               | 0.0613 | 0.64     | -0.0613  | -0.1164               | -0.0061 | 0.03     |
| <b>CI median</b>         | 0.1107   | -0.0003               | 0.2216 | 0.05     | -0.0370  | -0.1280               | 0.0541  | 0.43     |

Cell Index (maximum per subject)

| Parameter                | 30 days  |                       |        |          | 180 days |                       |         |          |
|--------------------------|----------|-----------------------|--------|----------|----------|-----------------------|---------|----------|
|                          | Estimate | 95% Confidence Limits |        | P        | Estimate | 95% Confidence Limits |         | P        |
| <b>IVH volume</b>        | 0.0690   | 0.0453                | 0.0927 | < 0.0001 | 0.0495   | 0.0331                | 0.0658  | < 0.0001 |
| <b>IVH evacuation</b>    | -0.8207  | -1.9075               | 0.2661 | 0.14     | -0.3843  | -0.9658               | 0.1972  | 0.20     |
| <b>ICH volume</b>        | 0.2374   | 0.1514                | 0.3234 | < 0.0001 | 0.1171   | 0.0766                | 0.1575  | < 0.0001 |
| <b>ICH: thalamus</b>     | 1.3096   | 0.5622                | 2.0571 | 0.0006   | 0.9918   | 0.3651                | 1.6185  | 0.002    |
| <b>GCS: presentation</b> | -0.0136  | -0.0933               | 0.0660 | 0.74     | -0.0633  | -0.1185               | -0.0082 | 0.02     |
| <b>CI maximum</b>        | 0.0110   | -0.0058               | 0.0277 | 0.20     | -0.0087  | -0.0233               | 0.0058  | 0.24     |

**Table e-11**  
**Multivariate Modeling of Mortality at 30 and 180 days in relation to**  
**CSF WBC count, cWBC and Cell Index**

| CSF WBC (mean per subject) |          |                       |         |          |          |                       |         |          |
|----------------------------|----------|-----------------------|---------|----------|----------|-----------------------|---------|----------|
| 30 days                    |          |                       |         |          | 180 days |                       |         |          |
| Parameter                  | Estimate | 95% Confidence Limits |         | P        | Estimate | 95% Confidence Limits |         | P        |
| <b>IVH volume</b>          | -0.0523  | -0.0692               | -0.0353 | < 0.0001 | -0.0382  | -0.0518               | -0.0246 | < 0.0001 |
| <b>IVH evacuation</b>      | 0.2713   | -0.2283               | 0.7708  | 0.29     | 0.1801   | -0.3232               | 0.6834  | 0.48     |
| <b>ICH volume</b>          | -0.0202  | -0.0717               | 0.0313  | 0.44     | -0.0501  | -0.0879               | -0.0123 | 0.009    |
| <b>ICH: thalamus</b>       | -1.5827  | -2.6065               | -0.5590 | 0.002    | -0.7279  | -1.3764               | -0.0794 | 0.03     |
| <b>GCS: presentation</b>   | 0.0908   | 0.0060                | 0.1755  | 0.04     | 0.0851   | 0.0262                | 0.1439  | 0.005    |
| <b>CSF WBC mean</b>        | 0.0001   | -0.0003               | 0.0004  | 0.71     | 0.0002   | -0.0001               | 0.0004  | 0.22     |

| CSF WBC (median per subject) |          |                       |         |          |          |                       |         |          |
|------------------------------|----------|-----------------------|---------|----------|----------|-----------------------|---------|----------|
| 30 days                      |          |                       |         |          | 180 days |                       |         |          |
| Parameter                    | Estimate | 95% Confidence Limits |         | P        | Estimate | 95% Confidence Limits |         | P        |
| <b>IVH volume</b>            | -0.0529  | -0.0698               | -0.0360 | < 0.0001 | -0.0385  | -0.0519               | -0.0251 | < 0.0001 |
| <b>IVH evacuation</b>        | 0.2400   | -0.2634               | 0.7435  | 0.35     | 0.1665   | -0.3330               | 0.6660  | 0.51     |
| <b>ICH volume</b>            | -0.0214  | -0.0724               | 0.0296  | 0.41     | -0.0503  | -0.0876               | -0.0130 | 0.008    |
| <b>ICH: thalamus</b>         | -1.5659  | -2.5808               | -0.5511 | 0.003    | -0.7342  | -1.3774               | -0.0910 | 0.03     |
| <b>GCS: presentation</b>     | 0.0924   | 0.0077                | 0.1771  | 0.03     | 0.0860   | 0.0267                | 0.1452  | 0.005    |
| <b>CSF WBC median</b>        | 0.0002   | -0.0002               | 0.0006  | 0.30     | 0.0003   | -0.0001               | 0.0006  | 0.11     |

| CSF WBC (maximum per subject) |          |                       |         |          |          |                       |         |          |
|-------------------------------|----------|-----------------------|---------|----------|----------|-----------------------|---------|----------|
| 30 days                       |          |                       |         |          | 180 days |                       |         |          |
| Parameter                     | Estimate | 95% Confidence Limits |         | P        | Estimate | 95% Confidence Limits |         | P        |
| <b>IVH volume</b>             | -0.0520  | -0.0690               | -0.0351 | < 0.0001 | -0.0377  | -0.0513               | -0.0242 | < 0.0001 |
| <b>IVH evacuation</b>         | 0.2837   | -0.2145               | 0.7818  | 0.26     | 0.1922   | -0.3149               | 0.6994  | 0.46     |
| <b>ICH volume</b>             | -0.0194  | -0.0708               | 0.0319  | 0.46     | -0.0496  | -0.0871               | -0.0120 | 0.01     |
| <b>ICH: thalamus</b>          | -1.5925  | -2.6233               | -0.5618 | 0.003    | -0.7224  | -1.3708               | -0.0740 | 0.03     |
| <b>GCS: presentation</b>      | 0.0896   | 0.0051                | 0.1741  | 0.04     | 0.0838   | 0.0252                | 0.1424  | 0.005    |
| <b>CSF WBC maximum</b>        | 0.0000   | -0.0001               | 0.0001  | 0.88     | 0.0001   | -0.0000               | 0.0001  | 0.25     |

cWBC (mean per subject)

| Parameter                | 30 days  |                       |         |          | 180 days |                       |         |          |
|--------------------------|----------|-----------------------|---------|----------|----------|-----------------------|---------|----------|
|                          | Estimate | 95% Confidence Limits |         | P        | Estimate | 95% Confidence Limits |         | P        |
| <b>IVH volume</b>        | -0.0463  | -0.0643               | -0.0284 | < 0.0001 | -0.0316  | -0.0457               | -0.0176 | < 0.0001 |
| <b>IVH evacuation</b>    | 0.3112   | -0.1777               | 0.8002  | 0.21     | 0.1458   | -0.3494               | 0.6410  | 0.56     |
| <b>ICH volume</b>        | -0.0223  | -0.0738               | 0.0292  | 0.40     | -0.0502  | -0.0879               | -0.0125 | 0.009    |
| <b>ICH: thalamus</b>     | -1.6943  | -2.7947               | -0.5939 | 0.003    | -0.7354  | -1.3943               | -0.0765 | 0.03     |
| <b>GCS: presentation</b> | 0.0764   | -0.0099               | 0.1627  | 0.08     | 0.0741   | 0.0141                | 0.1342  | 0.02     |
| <b>cWBC mean</b>         | -0.0001  | -0.0006               | 0.0003  | 0.56     | 0.0000   | -0.0003               | 0.0004  | 0.81     |

cWBC (median per subject)

| Parameter                | 30 days  |                       |         |          | 180 days |                       |         |          |
|--------------------------|----------|-----------------------|---------|----------|----------|-----------------------|---------|----------|
|                          | Estimate | 95% Confidence Limits |         | P        | Estimate | 95% Confidence Limits |         | P        |
| <b>IVH volume</b>        | -0.0467  | -0.0648               | -0.0287 | < 0.0001 | -0.0319  | -0.0459               | -0.0179 | < 0.0001 |
| <b>IVH evacuation</b>    | 0.2862   | -0.2015               | 0.7739  | 0.25     | 0.1268   | -0.3637               | 0.6173  | 0.61     |
| <b>ICH volume</b>        | -0.0236  | -0.0753               | 0.0281  | 0.37     | -0.0518  | -0.0896               | -0.0140 | 0.007    |
| <b>ICH: thalamus</b>     | -1.6733  | -2.7613               | -0.5853 | 0.003    | -0.7308  | -1.3878               | -0.0737 | 0.03     |
| <b>GCS: presentation</b> | 0.0803   | -0.0052               | 0.1658  | 0.07     | 0.0773   | 0.0171                | 0.1376  | 0.01     |
| <b>cWBC median</b>       | -0.0000  | -0.0006               | 0.0006  | 0.99     | 0.0003   | -0.0002               | 0.0009  | 0.23     |

cWBC maximum per subject)

| Parameter                | 30 days  |                       |         |          | 180 days |                       |         |          |
|--------------------------|----------|-----------------------|---------|----------|----------|-----------------------|---------|----------|
|                          | Estimate | 95% Confidence Limits |         | P        | Estimate | 95% Confidence Limits |         | P        |
| <b>IVH volume</b>        | -0.0463  | -0.0642               | -0.0284 | < 0.0001 | -0.0314  | -0.0454               | -0.0174 | < 0.0001 |
| <b>IVH evacuation</b>    | 0.3118   | -0.1777               | 0.8013  | 0.21     | 0.1554   | -0.3424               | 0.6532  | 0.54     |
| <b>ICH volume</b>        | -0.0223  | -0.0736               | 0.0290  | 0.39     | -0.0497  | -0.0871               | -0.0123 | 0.009    |
| <b>ICH: thalamus</b>     | -1.7067  | -2.8251               | -0.5884 | 0.003    | -0.7426  | -1.4023               | -0.0828 | 0.03     |
| <b>GCS: presentation</b> | 0.0765   | -0.0094               | 0.1624  | 0.08     | 0.0728   | 0.0130                | 0.1327  | 0.02     |
| <b>cWBC maximum</b>      | -0.0000  | -0.0002               | 0.0001  | 0.50     | -0.0000  | -0.0001               | 0.0001  | 0.96     |

Cell Index (mean per subject)

| Parameter                | 30 days  |                       |         |          | 180 days |                       |         |          |
|--------------------------|----------|-----------------------|---------|----------|----------|-----------------------|---------|----------|
|                          | Estimate | 95% Confidence Limits |         | P        | Estimate | 95% Confidence Limits |         | P        |
| <b>IVH volume</b>        | -0.0469  | -0.0650               | -0.0287 | < 0.0001 | -0.0314  | -0.0452               | -0.0175 | < 0.0001 |
| <b>IVH evacuation</b>    | 0.2988   | -0.1873               | 0.7850  | 0.23     | 0.1557   | -0.3380               | 0.6493  | 0.54     |
| <b>ICH volume</b>        | -0.0243  | -0.0755               | 0.0269  | 0.35     | -0.0469  | -0.0847               | -0.0090 | 0.02     |
| <b>ICH: thalamus</b>     | -1.6866  | -2.7940               | -0.5791 | 0.003    | -0.7405  | -1.4072               | -0.0738 | 0.03     |
| <b>GCS: presentation</b> | 0.0782   | -0.0064               | 0.1628  | 0.07     | 0.0768   | 0.0170                | 0.1366  | 0.01     |
| <b>CI mean</b>           | -0.0206  | -0.0613               | 0.0201  | 0.32     | -0.0059  | -0.0413               | 0.0295  | 0.74     |

Cell Index (median per subject)

| Parameter                | 30 days  |                       |         |          | 180 days |                       |         |          |
|--------------------------|----------|-----------------------|---------|----------|----------|-----------------------|---------|----------|
|                          | Estimate | 95% Confidence Limits |         | P        | Estimate | 95% Confidence Limits |         | P        |
| <b>IVH volume</b>        | -0.0467  | -0.0646               | -0.0287 | < 0.0001 | -0.0313  | -0.0451               | -0.0175 | < 0.0001 |
| <b>IVH evacuation</b>    | 0.3026   | -0.1799               | 0.7851  | 0.22     | 0.1523   | -0.3408               | 0.6455  | 0.54     |
| <b>ICH volume</b>        | -0.0248  | -0.0757               | 0.0261  | 0.34     | -0.0469  | -0.0848               | -0.0090 | 0.02     |
| <b>ICH: thalamus</b>     | -1.6649  | -2.7510               | -0.5788 | 0.003    | -0.7369  | -1.4023               | -0.0715 | 0.03     |
| <b>GCS: presentation</b> | 0.0787   | -0.0061               | 0.1635  | 0.07     | 0.0769   | 0.0169                | 0.1369  | 0.01     |
| <b>CI median</b>         | -0.0382  | -0.1489               | 0.0725  | 0.50     | -0.0026  | -0.1004               | 0.0952  | 0.96     |

Cell Index (maximum per subject)

| Parameter                | 30 days  |                       |         |          | 180 days |                       |         |          |
|--------------------------|----------|-----------------------|---------|----------|----------|-----------------------|---------|----------|
|                          | Estimate | 95% Confidence Limits |         | P        | Estimate | 95% Confidence Limits |         | P        |
| <b>IVH volume</b>        | -0.0470  | -0.0652               | -0.0288 | < 0.0001 | -0.0313  | -0.0452               | -0.0175 | < 0.0001 |
| <b>IVH evacuation</b>    | 0.2955   | -0.1911               | 0.7821  | 0.23     | 0.1525   | -0.3409               | 0.6458  | 0.54     |
| <b>ICH volume</b>        | -0.0242  | -0.0756               | 0.0272  | 0.36     | -0.0469  | -0.0848               | -0.0090 | 0.02     |
| <b>ICH: thalamus</b>     | -1.6926  | -2.8041               | -0.5811 | 0.003    | -0.7382  | -1.4051               | -0.0713 | 0.03     |
| <b>GCS: presentation</b> | 0.0780   | -0.0064               | 0.1625  | 0.07     | 0.0768   | 0.0171                | 0.1365  | 0.01     |
| <b>CI maximum</b>        | -0.0060  | -0.0168               | 0.0048  | 0.27     | -0.0007  | -0.0104               | 0.0090  | 0.89     |

**Table e-12**

**Characteristics of IVH cases with high inflammatory response based on CSF WBC count**

| <b>Variable</b>                                  | <b>Quartile with Highest WBC</b> | <b>Rest of subjects</b> | <b>P</b> |
|--------------------------------------------------|----------------------------------|-------------------------|----------|
| n                                                | 116                              | 348                     |          |
| <b>Demographic variables</b>                     |                                  |                         |          |
| Age in Years:<br>Median [IQR]                    | 59 [51-67]                       | 56 [48-65]              | 0.07     |
| Gender: Female                                   | 62 (53.5%)                       | 148 (42.5%)             | 0.04     |
| Race                                             |                                  |                         |          |
| White                                            | 63 (54.3%)                       | 207 (59.5%)             | 0.82     |
| African American                                 | 46 (39.7%)                       | 124 (34.6%)             |          |
| Ethnicity                                        |                                  |                         |          |
| Hispanic/Latino                                  | 19 (16.4%)                       | 39 (11.2%)              | 0.15     |
| <b>Clinical Variables</b>                        |                                  |                         |          |
| Enrollment GCS Total:<br>Median [IQR]            | 9 [5 – 14]                       | 11 [7 – 14]             | 0.02     |
| Diagnosis IVH Volume (mL):<br>Median [IQR]       | 43.9 [31.1-58.1]                 | 32.3 [21.3-45.9]        | < 0.0001 |
| Stability IVH Volume (mL):<br>Median [IQR]       | 28.1 [19.3-40.5]                 | 20.2 [11.3-33.1]        | 0.0006   |
| Diagnosis ICH Volume (mL):<br>Median [IQR]       | 9.27 [3.8-16.0]                  | 7.52 [3.0-13.3]         | 0.18     |
| Diagnosis ICH location:<br>Thalamus (%)          | 56 (48.3%)                       | 216 (62.07%)            | 0.009    |
| <b>Treatment Variables</b>                       |                                  |                         |          |
| Treatment (alteplase)                            | 78 (67.2%)                       | 156 (44.8%)             | < 0.0001 |
| IVH clearance (%):<br>Median [IQR]               | 68.0 [42.6-83.8]                 | 55.7 [33.3-75.0]        | 0.04     |
| Diagnosis to first EVD (hrs):<br>Median [IQR]    | 3.8 [2.6-6.0]                    | 4.3 [2.9-6.5]           | 0.19     |
| Ictus to first EVD (hrs):<br>Median [IQR]        | 7.5 [4.6-11.4]                   | 7.5 [5.0-11.9]          | 0.56     |
| Ictus to last EVD removal (hrs):<br>Median [IQR] | 292.6 [231.4-368.7]              | 268.0 [210.4-354.4]     | 0.68     |
| Ictus to first dose (hrs):<br>Median [IQR]       | 57.8 [46.2-71.1]                 | 57.9 [46.0-71.2]        | 0.97     |
| ICU stay (days):<br>Median [IQR]                 | 16.0 [12.0-22.5]                 | 15.0 [11.0-21.0]        | 0.42     |
| <b>Mortality (% , at 30 days)</b>                | 14 (12.1)                        | 37 (10.6)               | 0.67     |
| <b>Mortality (% , at 180 days)</b>               | 24 (20.7)                        | 83 (23.9)               | 0.48     |
| <b>mRS 0-3 (% , at 30 days)</b>                  | 17 (14.7)                        | 74 (21.3)               | 0.12     |
| <b>mRS 0-3 (% , at 180 days)</b>                 | 53 (45.7)                        | 170 (48.9)              | 0.56     |

**Table e-13**

**Characteristics of IVH cases with high inflammatory response based on CSF cWBC**

| <b>Variable</b>                                  | <b>Quartile with Highest cWBC</b> | <b>Rest of subjects</b> | <b>P</b> |
|--------------------------------------------------|-----------------------------------|-------------------------|----------|
| n                                                | 106                               | 317                     |          |
| <b>Demographic variables</b>                     |                                   |                         |          |
| Age in Years:<br>Median [IQR]                    | 55 [49-64]                        | 59 [51-67]              | 0.11     |
| Gender: Female                                   | 50 (47.2%)                        | 144 (45.4%)             | 0.76     |
| Race                                             |                                   |                         |          |
| White                                            | 61 (57.6%)                        | 182 (57.4%)             | 0.86     |
| African American                                 | 37 (34.9%)                        | 120 (37.9%)             |          |
| Ethnicity                                        |                                   |                         |          |
| Hispanic/Latino                                  | 16 (15.1%)                        | 35 (11.0%)              | 0.15     |
| <b>Clinical Variables</b>                        |                                   |                         |          |
| Enrollment GCS Total:<br>Median [IQR]            | 9 [6 – 13]                        | 11 [7 – 14]             | 0.01     |
| Diagnosis IVH Volume (mL):<br>Median [IQR]       | 40.1 [27.8-52.0]                  | 33.4 [21.8-48.2]        | 0.01     |
| Stability IVH Volume (mL):<br>Median [IQR]       | 26.5 [17.4-37.6]                  | 20.4 [11.6-36.3]        | 0.02     |
| Diagnosis ICH Volume (mL):<br>Median [IQR]       | 7.19 [2.1-14.4]                   | 8.14 [3.2-13.4]         | 0.18     |
| Diagnosis ICH location:<br>Thalamus (%)          | 54 (50.9%)                        | 120 (37.9%)             | 0.02     |
| <b>Treatment Variables</b>                       |                                   |                         |          |
| Treatment (alteplase)                            | 70 (66.0%)                        | 146 (46.1%)             | 0.0004   |
| IVH evacuation (%):<br>Median [IQR]              | 69.4 [46.0-82.7]                  | 54.7 [32.0-75.0]        | 0.001    |
| Diagnosis to first EVD (hrs):<br>Median [IQR]    | 3.9 [2.7-6.1]                     | 4.3 [2.9-6.4]           | 0.79     |
| Ictus to first EVD (hrs):<br>Median [IQR]        | 7.9 [5.0-13.5]                    | 7.5 [5.0-11.8]          | 0.49     |
| Ictus to last EVD removal (hrs):<br>Median [IQR] | 302.9 [231.4-368.7]               | 274.0 [210.4-354.4]     | 0.78     |
| Ictus to first dose (hrs):<br>Median [IQR]       | 58.2 [46.1-71.5]                  | 57.6 [46.0-70.5]        | 0.61     |
| ICU stay (days):<br>Median [IQR]                 | 16.0 [12.0-21.0]                  | 15.0 [11.0-21.0]        | 0.47     |
| <b>Mortality (% , at 30 days)</b>                | 13 (12.3)                         | 34 (10.7)               | 0.67     |
| <b>Mortality (% , at 180 days)</b>               | 23 (21.7)                         | 76 (24.0)               | 0.63     |
| <b>mRS 0-3 (% , at 30 days)</b>                  | 25 (23.6)                         | 63 (19.9)               | 0.42     |
| <b>mRS 0-3 (% , at 180 days)</b>                 | 54 (50.9)                         | 154 (48.6)              | 0.67     |

**Table e-14**

**Characteristics of IVH subjects with high inflammatory response based on CSF cell index**

| <b>Variable</b>                                  | <b>Quartile with Highest CI</b> | <b>Rest of subjects</b> | <b>P</b> |
|--------------------------------------------------|---------------------------------|-------------------------|----------|
| n                                                | 105                             | 317                     |          |
| <b>Demographic variables</b>                     |                                 |                         |          |
| Age in Years:<br>Median [IQR]                    | 56 [51-66]                      | 58 [50-66]              | 0.89     |
| Gender: Female                                   | 41 (39.1%)                      | 153 (48.3%)             | 0.10     |
| <b>Race</b>                                      |                                 |                         |          |
| White                                            | 68 (64.8%)                      | 174 (54.9%)             | 0.29     |
| African American                                 | 35 (33.3%)                      | 122 (38.5%)             |          |
| <b>Ethnicity</b>                                 |                                 |                         |          |
| Hispanic/Latino                                  | 13 (12.4%)                      | 37 (11.7%)              | 0.85     |
| <b>Clinical Variables</b>                        |                                 |                         |          |
| Enrollment GCS Total:<br>Median [IQR]            | 9 [5 – 13]                      | 11 [7 – 14]             | 0.06     |
| Diagnosis IVH Volume (mL):<br>Median [IQR]       | 35.65 [21.8-46.9]               | 35.4 [23.7-49.9]        | 0.64     |
| Stability IVH Volume (mL):<br>Median [IQR]       | 21.7 [11.8-35.8]                | 21.9 [13.3-37.6]        | 0.33     |
| Diagnosis ICH Volume (mL):<br>Median [IQR]       | 6.5 [2.9-13.3]                  | 8.3 [3.1-13.8]          | 0.40     |
| Diagnosis ICH location:<br>Thalamus (%)          | 46 (43.8%)                      | 128 (30.3%)             | 0.54     |
| <b>Treatment Variables</b>                       |                                 |                         |          |
| Treatment (alteplase)                            | 63 (60.0%)                      | 153 (48.3%)             | 0.04     |
| IVH evacuation (%):<br>Median [IQR]              | 65.2 [45.7-80.7]                | 55.2 [32.2-76.4]        | 0.003    |
| Diagnosis to first EVD (hrs):<br>Median [IQR]    | 3.9 [2.7-6.1]                   | 4.3 [2.9-6.4]           | 0.78     |
| Ictus to first EVD (hrs):<br>Median [IQR]        | 7.7 [4.5-14.1]                  | 7.6 [5.0-11.5]          | 0.29     |
| Ictus to last EVD removal (hrs):<br>Median [IQR] | 302.9 [231.4-368.7]             | 274.0 [210.4-354.4]     | 0.18     |
| Ictus to first dose (hrs):<br>Median [IQR]       | 58.8 [47.0-72.4]                | 57.6 [45.4-69.4]        | 0.13     |
| ICU stay (days):<br>Median [IQR]                 | 15.0 [11.0-21.0]                | 14.0 [11.0-21.0]        | 0.91     |
| <b>Mortality (% , at 30 days)</b>                | 13 (12.4)                       | 34 (10.7)               | 0.64     |
| <b>Mortality (% , at 180 days)</b>               | 24 (22.9)                       | 75 (23.7)               | 0.87     |
| <b>mRS 0-3 (% , at 30 days)</b>                  | 20 (19.1)                       | 68 (21.5)               | 0.60     |
| <b>mRS 0-3 (% , at 180 days)</b>                 | 56 (53.3)                       | 151 (47.6)              | 0.31     |

**Table e-15: Systematic literature review of CSF inflammation in relation to hemorrhagic stroke\***

| Study                              | Subjects                 | Design   | Data                                         | n   | Samples | Methods                                                                                                                                                  | Results                                                                                                                                                                                                |
|------------------------------------|--------------------------|----------|----------------------------------------------|-----|---------|----------------------------------------------------------------------------------------------------------------------------------------------------------|--------------------------------------------------------------------------------------------------------------------------------------------------------------------------------------------------------|
| <i>Kramer 2015</i> <sup>1</sup>    | IVH (IVT 50%)            | Pro      | Cell count, ILs, TNF, CBC                    | 12  | 48      | Subjects randomized to IVT or saline, CSF at baseline and daily for 3 days                                                                               | Inflammatory markers and WBC increased in the first 2 days before dropping at 72 hours. CSF pleocytosis (WBC, RBC) was more evident with IVT but no significant Diff.                                  |
| <i>Kaestner 2013</i> <sup>2</sup>  | SAH/IVH                  | Pro      | CSF Albumin, TGF-beta                        | 42  | 420     | Patient reviewed after 6 months and categorized for development of hydrocephalus                                                                         | CSF albumin is more than three times higher in IVH. No correlation with hydrocephalus development                                                                                                      |
| <i>Halleivi 2012</i> <sup>3</sup>  | IVH (62% IVT)            | Retro    | Chemistry, corrected WBC, CBC                | 29  | 551     | Excluded ventriculitis, compared trends with/out IVT                                                                                                     | Following IVH a brisk and transient cellular inflammation arises within the ventricles. This response seems to be attenuated by IVT therapy                                                            |
| <i>King 2012</i> <sup>4</sup>      | IVH (44% IVT)            | Pro      | CSF hemoglobin                               | 16  | 80      | Subjects randomized to Uk vs placebo, CSF drawn daily for 5 days                                                                                         | Increase in the drained CSF Hb concentration with Uk                                                                                                                                                   |
| <i>Boeer 2011</i> <sup>5</sup>     | IVH included             | Retro    | Cell count, chemistry, ure and ILs, CBC, CRP | 50  | 50+6    | Only 1 sample/patient (trends for 1 and 1 subjects were plotted), WBC not corrected for blood. ROC aluation of each parameter in predicting +ve culture. | Pilot study, both IL1 $\beta$ and IL8 should be further evaluated                                                                                                                                      |
| <i>Simard 2011</i> <sup>6</sup>    | IVH                      | In Vitro | NK-kB, p65                                   |     | N/M     | Immuno-labelling                                                                                                                                         | An inflammatory response is upregulation and activation of NF- $\kappa$ B signaling by the CSF barrier cells of the choroid plexus and ependymal lining                                                |
| <i>Ducruet 2010</i> <sup>7</sup>   | IVH (IVT 43%)            | Retro    | Edema, aseptic meningitis                    | 30  | N/M     | IVT (n=13) vs control (n=17), comparing hematommal edema, CSF inflammatory response and shunt dependency                                                 | Increase in perihematoma edema in this cohort as well as worsening rates of sterile meningitis                                                                                                         |
| <i>Muttaiyah 2008</i> <sup>8</sup> | IVH included             | Retro    | Protein, glucose                             | 60  | 454     | 454 samples over 1 year, comparing EVD with and without ventriculitis                                                                                    | Median glucose is lower, no Diff in protein                                                                                                                                                            |
| <i>Boeer 2008</i> <sup>9</sup>     | IVH included             | Retro    | Cell count, protein                          | 264 | 724     | ROC analysis performed using absolute count and adjusted counts using two formulas                                                                       | Acceptable sensitivity and specificity for absolute WBC and granulocyte count. Blood-contaminated samples should not be corrected for the RBC count                                                    |
| <i>Wong 2008</i> <sup>10</sup>     | SAH/IVH                  | Pro      | CSF lactate                                  | 16  | 34      | Comparing CSF lactate levels in IVH with/out ventriculitis                                                                                               | CSF lactate cutoff of 4mmol/L has a 60% positive predictive value and 100% negative predictive value for CSF infection                                                                                 |
| <i>Pfausler 2004</i> <sup>11</sup> | IVH                      | Pro      | Cell count, corrected VBC, chemistry, CBC    | 13  | N/M     | Consecutive IVH, daily CSF. Culture +ve in n=7 med day 0, trends in pleocytosis was plotted for both groups                                              | CI is highly indicative for nosocomial ventriculostomy-related ventriculitis in IVH. Preceding the diagnostic capacity by conventional means on average by 3 days.                                     |
| <i>Gordon 2014</i> <sup>12</sup>   | IVH                      | Pro      | Cell count, chemistry and sTREM-1            | 73  | 73      | 3/wk sampling, comparing EVD with and without ventriculitis                                                                                              | Significantly different glucose and protein                                                                                                                                                            |
| <i>Savmann 2002</i> <sup>13</sup>  | Neonatal IVH             | Pro      | Cytokines                                    | 43  | 43      | IVH group Vs Control group tested for inflammatory cytokines                                                                                             | Intense and prolonged inflammatory reaction with high levels of pro-inflammatory cytokines (TNF-a, IL-1b, IL-6 and IL-8) in CSF from preterm infants with neonatal IVH compared with preterm controls. |
| <i>Hudgins 1997</i> <sup>14</sup>  | Neonatal IVH             | Pro      | Cell count, protein, glucose and cultures    | 18  | 126     | 7 day treatment with low Vs high dose urokinase                                                                                                          | No Diff in RBC count or protein between groups. RBC count occasionally demonstrated a rise during treatment caused by clot lysis.                                                                      |
| <i>Lee 1975</i> <sup>15</sup>      | Stroke (lumbar puncture) | Retro    | Cell count, chemistry                        | 61  | 61      | Compared CSF characteristics for ICH, Ischaemic and hemorrhagic strokes.                                                                                 | CSF leukocyte pleocytosis is common after acute cerebral hemorrhage or infarction, and peaks three to four days after onset. CSF neutrophils may be increased sufficiently to simulate infection.      |

\*Literature search was performed using Medline PubMed, Scopus and Ovid databases for English publications using the keywords “cerebrospinal fluid (CSF)” or “CSF pleocytosis” or “CSF Inflammation” and “Intracerebral hemorrhage” or “Intraventricular hemorrhage”. No timeframe, species or study type filters were used in our search. All articles in the English literature published through June 2015 were included in the search. The bibliographies of included articles were reviewed and cross-referenced for articles that may have been missed in the initial search. Titles of included articles were then screened to exclude those with irrelevant content. Abstracts were reviewed to exclude articles whose methodology did not include CSF analysis

IVH= intraventricular hemorrhage; SAH= subarachnoid hemorrhage; CSF= cerebrospinal fluid; IVT= intraventricular thrombolysis

Pro= prospective; Retro=retrospective



## References

1. Kramer AH, Jenne CN, Zygun DA, et al. Intraventricular fibrinolysis with tissue plasminogen activator is associated with transient cerebrospinal fluid inflammation: a randomized controlled trial. *J Cereb Blood Flow Metab.* Aug 2015;35(8):1241-1248.
2. Kaestner S, Dimitriou I. TGF beta1 and TGF beta2 and their role in posthemorrhagic hydrocephalus following SAH and IVH. *J Neurol Surg A Cent Eur Neurosurg.* Sep 2013;74(5):279-284.
3. Hallevi H, Walker KC, Kasam M, Bornstein N, Grotta JC, Savitz SI. Inflammatory response to intraventricular hemorrhage: time course, magnitude and effect of t-PA. *J Neurol Sci.* Apr 15 2012;315(1-2):93-95.
4. King NK, Lai JL, Tan LB, et al. A randomized, placebo-controlled pilot study of patients with spontaneous intraventricular haemorrhage treated with intraventricular thrombolysis. *J Clin Neurosci.* Jul 2012;19(7):961-964.
5. Boeer K, Vogelsang H, Deufel T, Pfister W, Kiehntopf M. Immediate diagnosis of ventriculitis: evaluation of parameters independent of microbiological culture. *Acta Neurochir (Wien).* Sep 2011;153(9):1797-1805.
6. Simard PF, Tosun C, Melnichenko L, Ivanova S, Gerzanich V, Simard JM. Inflammation of the choroid plexus and ependymal layer of the ventricle following intraventricular hemorrhage. *Transl Stroke Res.* Jun 2011;2(2):227-231.
7. Ducruet AF, Hickman ZL, Zacharia BE, et al. Exacerbation of perihematomal edema and sterile meningitis with intraventricular administration of tissue plasminogen activator in patients with intracerebral hemorrhage. *Neurosurgery.* Apr 2010;66(4):648-655.
8. Muttaiyah S, Ritchie S, Upton A, Roberts S. Clinical parameters do not predict infection in patients with external ventricular drains: a retrospective observational study of daily cerebrospinal fluid analysis. *J Med Microbiol.* Feb 2008;57(Pt 2):207-209.
9. Boeer K, Siegmund R, Pfister W, Isenmann S, Deufel T. Correction of ventricular cerebrospinal fluid (CSF) samples for blood content does not increase sensitivity and specificity for the detection of CSF infection. *Clin Chem Lab Med.* 2008;46(6):842-848.
10. Wong GK, Poon WS, Ip M. Use of ventricular cerebrospinal fluid lactate measurement to diagnose cerebrospinal fluid infection in patients with intraventricular haemorrhage. *J Clin Neurosci.* Jun 2008;15(6):654-655.
11. Pfausler B, Beer R, Engelhardt K, Kemmler G, Mohsenipour I, Schmutzhard E. Cell index--a new parameter for the early diagnosis of ventriculostomy (external ventricular drainage)-related ventriculitis in patients with intraventricular hemorrhage? *Acta Neurochir (Wien).* May 2004;146(5):477-481.
12. Gordon M, Ramirez P, Soriano A, et al. Diagnosing external ventricular drain-related ventriculitis by means of local inflammatory response: soluble triggering receptor expressed on myeloid cells-1. *Crit Care.* Oct 20 2014;18(5):567.
13. Savman K, Blennow M, Hagberg H, Tarkowski E, Thoresen M, Whitelaw A. Cytokine response in cerebrospinal fluid from preterm infants with posthaemorrhagic ventricular dilatation. *Acta Paediatr.* 2002;91(12):1357-1363.
14. Hudgins RJ, Boydston WR, Hudgins PA, Morris R, Adler SM, Gilreath CL. Intrathecal urokinase as a treatment for intraventricular hemorrhage in the preterm infant. *Pediatr Neurosurg.* Jun 1997;26(6):281-287.

15. Lee MC, Heaney LM, Jacobson RL, Klassen AC. Cerebrospinal fluid in cerebral hemorrhage and infarction. *Stroke*. Nov-Dec 1975;6(6):638-641.
